# Supplementary material for: Circadian disruption promotes tumor growth by anabolic host metabolism; experimental evidence in a rat model
Source: PubMed Central journal article supplement (PMC5585981; doi:10.1186/s12885-017-3636-3), 2017-09-06
Supplement: 12885_2017_3636_MOESM1_ESM.pdf [file 12885_2017_3636_MOESM1_ESM.pdf]

1 Additional file 1.  
 2  
 3 Table 1. Primer sequences.

4  
 5

| Gen                       | Reference number | Sequence  |                         |
|---------------------------|------------------|-----------|-------------------------|
| <i>Tnf α</i>              | XM008772775.1    | Sense     | TTCATCCGTTCTCTACCCAGC   |
|                           |                  | Antisense | GCCACTACTTCAGCGTCTCG    |
| <i>Il6</i>                | NM 012589.2      | Sense     | TAGTGTGCTATGCCTAAG      |
|                           |                  | Antisense | TATTGCCAGTTCTTCGTA      |
| <i>Il1β</i>               | NM031512.2       | Sense     | GGCAACCACTTACCTATT      |
|                           |                  | Antisense | ATTCACATATAACAAGCAACAGA |
| <i>Il10</i>               | NM012854.2       | Sense     | CCTCTGGATACAGCTGCGAC    |
|                           |                  | Antisense | GTAGATGCCGGGTGGTTCAA    |
| <i>Tgf β1</i>             | NM021578.2       | Sense     | AGAGATTCAAGTCAACTGTGGAG |
|                           |                  | Antisense | CCAAGGTAACGCCAGGAA      |
| <i>Ppar α</i>             | NM013196.1       | Sense     | TGGAGTCCACGCATGTGAAG    |
|                           |                  | Antisense | CGCCAGCTTTAGCCGAATAG    |
| <i>Myc</i>                | NM012603.2       | Sense     | CACACAACGTCTTGGAACGTC   |
|                           |                  | Antisense | TCGCCGTTTCCTCAGTAAGT    |
| <i>Vegfa</i>              | NM001287114.1    | Sense     | ACGTTTTTGGGGAGCCTCAG    |
|                           |                  | Antisense | TGTCTTCTCTTTGCCAGGACC   |
| <i>Hif1-α</i>             | XM008764695.1    | Sense     | CAGGATTCCAGCAGACCCAG    |
|                           |                  | Antisense | TGCTGATGCCTTAGCAGTGG    |
| <i>Ir</i>                 | XM006248753.2    | Sense     | GGAGGGTCCTCTCTGAGCAT    |
|                           |                  | Antisense | CCTGGAGGCAGTCAAACCTACA  |
| <i>Slc2a1<br/>(Glut1)</i> | NM138827.1       | Sense     | CAGCCACTCTCCTATCTCCAC   |
|                           |                  | Antisense | TCCTGCGGTAAAGCCTCCTA    |
| <i>P53</i>                | NM030989.3       | Sense     | AGATAGTACTCGGCCCCCTC    |
|                           |                  | Antisense | TAGGTGCCAGGTCCAACAAC    |
| <i>Tbp</i>                | NM001004198.1    | Sense     | CTCAGTTACAGGTGGCAGCA    |
|                           |                  | Antisense | GCACAGAGCAAGCAACTCAC    |
| <i>Hprt</i>               | NM_012583.2      | Sense     | GCCTAAAAGACAGCGGCAAG    |
|                           |                  | Antisense | GGCTGCCTACAGGCTCATAG    |

|                                |                |           |                          |
|--------------------------------|----------------|-----------|--------------------------|
| <i>Hk2</i>                     | NM_012735.2    | Sense     | TGTCTCTGTATATTCCTACTGTAG |
|                                |                | Antisense | GCGAACAAACFCCTTACTT      |
| <i>Pkm2</i>                    | NM_053297.2    | Sense     | TGCTGAAGGAGATGATTA       |
|                                |                | Antisense | ACGGACATTCTTGATAGT       |
| <i>Ldh-a</i>                   | NM_017025.1    | Sense     | CGAGAGCATAATGAAGAAC      |
|                                |                | Antisense | TCCTTGATTCCATAGAGAC      |
| <i>Cpt1a</i>                   | NM_031559.2    | Sense     | TTACAAGGCAGAAGAGTG       |
|                                |                | Antisense | GCAATGGACAGATTAGAAC      |
| <i>Fasn</i>                    | NM_017332.1    | Sense     | TACCTTAACACGACTCAAC      |
|                                |                | Antisense | TGATGGAACCTTCAATGG       |
| <i>Acaca</i>                   | NM_022193.1    | Sense     | GTCACACTTCACTCTATG       |
|                                |                | Antisense | CTGTCATCCTCAATATCG       |
| <i>Srebpl</i>                  | NM_001276707.1 | Sense     | TACCGTTCCTCTATCAAT       |
|                                |                | Antisense | AGACAGCAGATTTATTCAG      |
| <i>Hadha</i>                   | NM_130826.2    | Sense     | CAGCACGAATATCACAAGAAGGA  |
|                                |                | Antisense | TGATGGCGGCAACAACAG       |
| <i>Acads</i>                   | NM_022512.2    | Sense     | ATGCCAACTCCTGGGCTTAC     |
|                                |                | Antisense | GGGATGCGACAGTCCTCAA      |
| <i>Ppar<math>\gamma</math></i> | NM_013124      | Sense     | GCCTGCGGAAGCCCTTTGGT     |
|                                |                | Antisense | CAGCAAGCCTGGGCGGTCTC     |

1

2 Table 2. Antibodies used for flow cytometry.

3

| Marker | Antibody                            | Brand                       |
|--------|-------------------------------------|-----------------------------|
| CD3    | Vio Blue conjugated anti-rat CD3    | (Miltenyi Biotech, Germany) |
| CD4    | PE-Vio770 conjugated anti-rat CD4   | (Miltenyi Biotech, Germany) |
| CD8b   | FITC conjugated anti-rat CD8b       | (Miltenyi Biotech, Germany) |
| CD45   | APC conjugated anti-rat CD45        | (Miltenyi Biotech, Germany) |
| CD45R  | PE Vio770 conjugated anti-rat CD45R | (Miltenyi Biotech, Germany) |
| CD161  | PE conjugated anti-rat CD161        | (Miltenyi Biotech, Germany) |
| CD43   | APC-Vio770 conjugated anti-rat CD43 | (Miltenyi Biotech, Germany) |

4

5

6

7

8

9

10

11

12
