# Supplementary material for: Circadian disruption promotes tumor growth by anabolic host metabolism; experimental evidence in a rat model
Source: PubMed Central journal article supplement (PMC5585981; doi:10.1186/s12885-017-3636-3), 2017-09-06

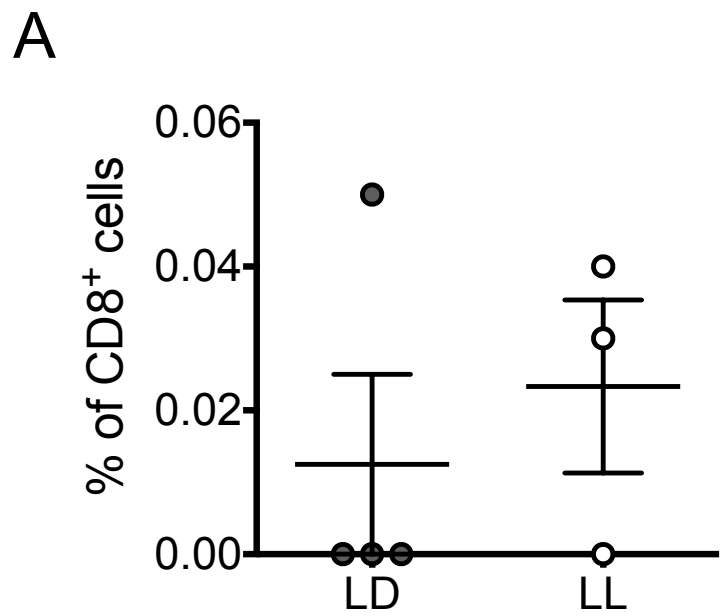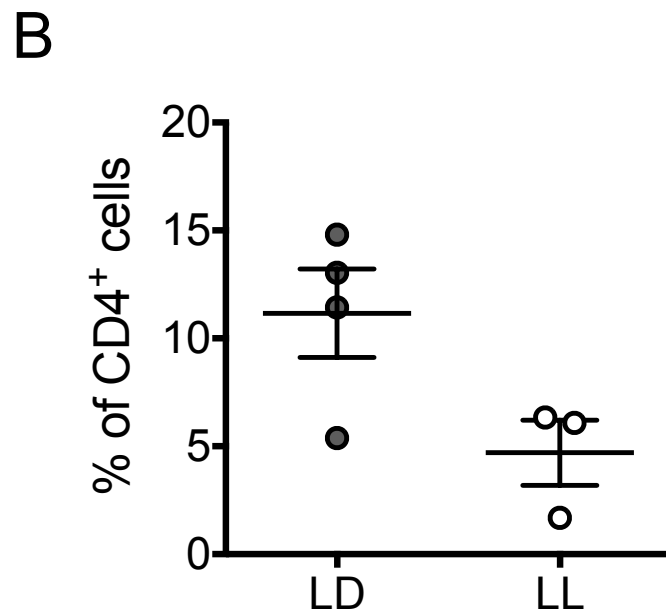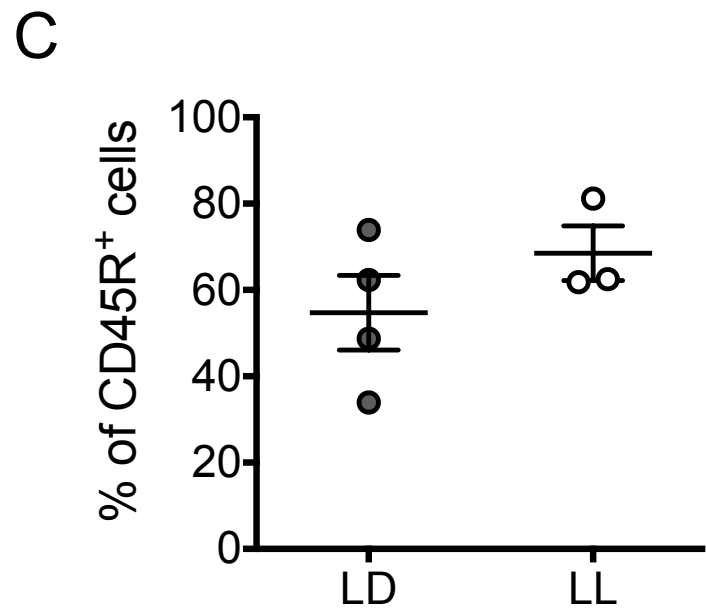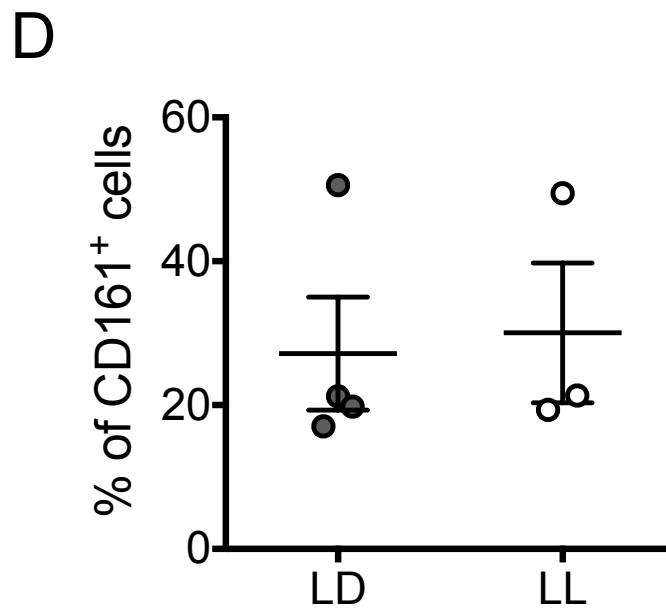

Supplement: 12885_2017_3636_MOESM4_ESM.pdf [file 12885_2017_3636_MOESM4_ESM.pdf]
